# Supplementary material
Source: HighWire-hosted journal article supplement (https://jme.bmj.com/content/42/7/455)
Supplement: inline-supplementary-material-1 [file inline-supplementary-material-1.pdf]

## Appendix A

| Documents included in assessment                                                                                                                                                                                                                                                                                                                                              |
|-------------------------------------------------------------------------------------------------------------------------------------------------------------------------------------------------------------------------------------------------------------------------------------------------------------------------------------------------------------------------------|
| Alberta HB, Berry RM, Levine AD. Risk disclosure and the recruitment of oocyte donors: Are advertisers telling the full story. <i>J Law Med Ethics</i> . 2014 June 1; 42(2):232-43.                                                                                                                                                                                           |
| Austin DM, Brisman MB. Essential elements of informed consent in egg donation. In: Sauer MV, ed. <i>Principles of Oocyte and Embryo Donation</i> . London: Springer-Verlag, 2013:337-350.                                                                                                                                                                                     |
| Baylis F. Assisted reproductive technologies: informed choice. <i>New Reproductive Technologies: Ethical Aspects</i> . Ottawa: Minister of Supply and Services Canada; 1993. p. 47–147.                                                                                                                                                                                       |
| Cahn N, Collins J. Fully informed consent for prospective egg donors. <i>Virtual Mentor</i> . 2014 Jan 1;16(1):49.                                                                                                                                                                                                                                                            |
| Campo-Englestein L. Why we need oversight for egg donation. <i>Bioethics Today</i> . 2013 June 17. <a href="http://www.amc.edu/bioethicsblog/post.cfm/why-we-need-oversight-for-egg-donation">http://www.amc.edu/bioethicsblog/post.cfm/why-we-need-oversight-for-egg-donation</a> . Accessed Jan 2016.                                                                       |
| Commission de l'éthique de la science et de la technologie. Position Statement - Ethics and Assisted Reproduction: Guidelines for the Donation of Gametes and Embryos, Surrogacy and Preimplantation Genetic Diagnosis (Summary and Recommendations). Gouvernement du Québec; 2009.                                                                                           |
| Daar J. Regulating the fiction of informed consent in ART medicine. <i>Am J Bioeth</i> 2001; 1(4): 19–20.                                                                                                                                                                                                                                                                     |
| Ethics Committee of the American Society for Reproductive Medicine. Financial compensation of oocyte donors. <i>Fertil Steril</i> . 2007 Aug;88(2):305-9.                                                                                                                                                                                                                     |
| Gruben V. Women as patients, not spare parts: Examining the Relationship Between the Physician and Women Egg Providers. <i>Can J Women Law</i> . 2013;25(2):249–83.                                                                                                                                                                                                           |
| Human Fertilisation and Embryology Authority. HFEA Code of Practice Guidance Note 11 [Internet]. 8 edition; 2015, <a href="http://www.hfea.gov.uk/498.html">http://www.hfea.gov.uk/498.html</a> . Accessed 1 May 2015.                                                                                                                                                        |
| Kenney, NJ, McGowan ML. Looking back: egg donors' retrospective evaluations of their motivations, expectations, and experiences during their first donation cycle. <i>Fertil Steril</i> . 2010 Jan 15;93(2): 455-66.                                                                                                                                                          |
| Kramer W, Schneider J, Schultz N. US Oocyte donors: a retrospective study of medical and psychosocial issues. <i>Hum Reprod</i> 2009 Dec; 24(12):3144-49.                                                                                                                                                                                                                     |
| Martin R, Nisker J, Daya S, Miron P, Parish B. Ethical issues in assisted reproduction (Joint Canadian Fertility and Andrology Society/Society of Obstetricians and Gynaecologists of Canada Report). <i>J Obstet Gynaecol Can</i> . 1999;21(3):275–80.                                                                                                                       |
| New York State Department of Health. Model Form (Informed Consent for Egg Donors). <a href="http://www.health.ny.gov/regulations/task_force/consumers/docs/informed_consent_for_egg_donors_form.pdf">http://www.health.ny.gov/regulations/task_force/consumers/docs/informed_consent_for_egg_donors_form.pdf</a> . Accessed 21 Jan 2016.                                      |
| New York State Department of Health. Informed Consent for Egg Donors (Pratitioner's Guide to Using the Model Form). <a href="https://www.health.ny.gov/regulations/task_force/consumers/docs/informed_consent_for_egg_donors_guide.pdf">https://www.health.ny.gov/regulations/task_force/consumers/docs/informed_consent_for_egg_donors_guide.pdf</a> . Accessed 21 Jan 2016. |
| Practice Committee of the American Society for Reproductive Medicine. Recommendations for gamete and embryo donation: a committee opinion. <i>Fertil Steril</i> . 2013;99(1):47–62.                                                                                                                                                                                           |
| Schaefer GO, Sinaii N, Grady C. Informing egg donors of the potential for embryonic research: a survey of consent forms from U.S In Vitro Fertilization Clinics. <i>Fertil Steril</i> 2012 Feb;97(2):427-33.                                                                                                                                                                  |

Senators Gray L, Pearce R; Representatives Gowan, Montenegro: Senators Allen S, Harper, Melvin, Verschoor; Representatives Antenori, Burges, Driggs, Lesko, Nichols, Stevens, Weiers J. Informed consent for egg donation; requirements; unprofessional conduct. SB 1306 2010. <http://www.azleg.gov/legtext/49leg/2r/bills/sb1306p.pdf>. Accessed 21 Jan 2016.

Skillern A, Cedars M, Huddleston H. Egg donor informed consent tool (EDICT): development and validation of a new informed consent tool for oocyte donors. *Fertil Steril*. 2013 May;99(6):1733–8.

Skillern A, Cedars M, Huddleston H. Oocyte donors' comprehension as assessed by the EDICT (Egg Donor Informed Consent Tool). *Fertil Steril*. 2014 Jan;101(1):248-251.

Society of Assisted Reproductive Technologies. Model Form: Informed Consent for Egg Donors [Internet]. SART; 2014. [sart.org/uploadedFiles/Affiliates/SART/.../Forms/Egg%20Donation.docx](http://sart.org/uploadedFiles/Affiliates/SART/.../Forms/Egg%20Donation.docx). Accessed Jan 2016.

Strong C. How should IVF programs handle initial disclosure of information to prospective ovum donors? *Am J Bioeth*. 2001 Fall;1(4):23–5.

Swain ME. Oocyte donation: legal aspects. In: Goldgard JM, ed. *Third-Party Reproduction: A Comprehensive Guide*. New York: Springer 2014: 31-39.
